# Supplementary material for: A nested spin structure and single molecule magnet behaviour in an Fe8Dy12 heterometallic cyclic coordination cluster
Source: Royal Society of Chemistry journal article supplement (doi:10.1039/d3dt04141g), 2023-12-20
Supplement: d3dt04141g2.pdf [file d3dt04141g2.pdf]

## Supplementary Information

### **A Nested Spin Structure and Single Molecule Magnet Behaviour in an $\text{Fe}_8\text{Dy}_{12}$ Heterometallic Cyclic Coordination Cluster**

Yan Peng,<sup>\*a,b</sup> Jonas Braun,<sup>a,c</sup> Michael Schulze,<sup>d</sup> Hagen Kaemmerer,<sup>a,e</sup> Yannik F. Schneider,<sup>a,c</sup>  
Christopher E. Anson,<sup>a</sup> Wolfgang Wernsdorfer<sup>d</sup> and Annie K. Powell<sup>\*a,b,e</sup>

<sup>a</sup>Institute of Inorganic Chemistry, Karlsruhe Institute of Technology (KIT), Engesserstraße 15, 76131 Karlsruhe, Germany

<sup>b</sup>School of Chemistry and Chemical Engineering, Jiangxi University of Science and Technology, Ganzhou 341000, P.R. China.

<sup>c</sup>Institute of Nanotechnology (INT), Karlsruhe Institute of Technology (KIT), Hermann-von-Helmholtz-Platz 1, 76344 Eggenstein-Leopoldshafen, Germany

<sup>d</sup>Institute for Quantum Materials and Technologies (IQMT), Karlsruhe Institute of Technology (KIT), Hermann-von-Helmholtz-Platz 1, 76344 Eggenstein-Leopoldshafen, Germany

<sup>e</sup>Physikalisches Institut, Karlsruhe Institute of Technology (KIT), Engesserstrasse 15, 76131 Karlsruhe, Germany

Email: annie.powell@kit.edu, Email: py16882020@163.com

#### **Table of Content**

|                          |    |
|--------------------------|----|
| 1. Experimental          | 2  |
| 2. Crystallographic data | 3  |
| 3. Magnetic data         | 7  |
| 4. MAGELLAN              | 10 |
| 5. References            | 26 |

## **1. Experimental**

### **Crystallography:**

Data were measured from a crystal of dimensions  $0.07 \times 0.05 \times 0.04 \text{ mm}^3$  cooled to 150(2) K on a Bruker SMART Apex diffractometer on the PDIFF beamline with silicon-monochromated radiation of  $\lambda = 0.79942 \text{ \AA}$  from the ANKA (now KARA) synchrotron, Karlsruhe. Data were corrected for polarisation effects, absorption and primary beam decay.

The structure was solved by dual-space direct methods using SHELXT<sup>[a]</sup> and refined by full-matrix least-squares using SHELXL<sup>[b]</sup> on the Olex2 platform<sup>[c]</sup>. One tea ligand was disordered by twisting about the Dy-N bond, and the three methylene groups were refined as pairs of isotropic half-occupancy C atoms with similarity restraints on their N-C and C-C bond lengths. OH H-atoms were refined with restraints on the O-H bond lengths. Some of the lattice solvent molecules could be refined anisotropically, but others were badly disordered and their contributions to the structure factors were calculated using SQUEEZE.<sup>[d]</sup>

Crystallographic and refinement parameters are summarised in Table S1. Full crystallographic data and details of the structural determinations for the structures in this paper have been deposited with the Cambridge Crystallographic Data Centre as supplementary publication no. CCDC 2306455. Copies of the data can be obtained, free of charge, from <https://www.ccdc.cam.ac.uk/structures/>

Crystal data for **1**:  $\text{C}_{142}\text{H}_{300}\text{Dy}_{12}\text{Fe}_8\text{N}_{40}\text{O}_{102}$ , 6597.00 g mol<sup>-1</sup>, tetragonal,  $I4_1/acd$ ,  $a = 37.7905(13)$ ,  $c = 61.582(2) \text{ \AA}$ ,  $Z = 16$ ,  $V = 87947(7) \text{ \AA}^3$ ,  $T = 150(2) \text{ K}$ ,  $\rho_{\text{calc}} = 1.993 \text{ g cm}^{-3}$ ,  $F(000) = 51968$ ,  $\lambda = 0.79942 \text{ \AA}$ ,  $\mu = 6.236 \text{ mm}^{-1}$ ; 139306 data, 22903 unique ( $R_{\text{int}} = 0.0369$ ), 1298 parameters, final  $wR_2 = 0.1996$ ,  $S = 1.576$  (all data),  $R_1$  (18273 data with  $I > 2\sigma(I)$ ) = 0.0575. Full crystallographic data for the structure have been deposited with the Cambridge Crystallographic Data Centre as CCDC 2306455 (<https://www.ccdc.cam.ac.uk/structures/>)

### **Materials**

Elemental analyses (C/H/N) were performed using an Elemental Vario EL analyzer at the Institute of Inorganic Chemistry, Karlsruhe Institute of Technology. The IR spectrum was measured on a Nicolet iS 50 with ATR attachment. All reagents were obtained from commercial sources and used as received.

### **[Fe<sub>8</sub>Dy<sub>12</sub>(tea)<sub>8</sub>(teaH)<sub>12</sub>(NO<sub>3</sub>)<sub>12</sub>]**·8MeCN (1)****

A solution of 109 mg teaH<sub>3</sub> (1 mmol) and 100  $\mu\text{l}$  Et<sub>3</sub>N in 10ml MeCN was added dropwise to a stirred solution of 101 mg Fe(NO<sub>3</sub>)<sub>3</sub>·9H<sub>2</sub>O (0.25 mmol) and 112 mg Dy(NO<sub>3</sub>)<sub>3</sub>·6H<sub>2</sub>O (0.25 mmol) in 5 ml MeOH. This mixture was left stirring for 10 minutes after which 80  $\mu\text{l}$  of Et<sub>3</sub>N were added dropwise. After another 10 minutes of stirring the glass vial was sealed and left undisturbed to allow for crystallisation. The product was isolated after 14 days as colourless block shaped crystals in a yield of 47% (based on Dy).

Elemental analysis (calculated,  $C_{142}H_{300}Dy_{12}Fe_8N_{40}O_{102}$ ) C: 25.50%, H: 4.34%, N: 8.75%; (found) C: 25.46% H: 4.19% N: 8.62%.

ATR-IR (4000-400  $cm^{-1}$ ): 2963(w); 2849(s); 2705(w); 1628(w); 1458(s); 1366(m); 1289(s); 1163(w); 1060(s); 1023(s); 894(s); 814(m); 739(m); 621(m); 588(m); 551(m); 459(m).

### **Magnetic Measurements**

Magnetic susceptibility measurements on polycrystalline samples were obtained using a Quantum Design SQUID magnetometer MPMS-XL in the temperature range 1.8-300 K. Magnetisation isotherms were collected at 2-10 K between 0 and 7 T. Alternating current (ac) susceptibility measurements were performed with an oscillating field of 3 Oe and ac frequencies ranging from 1 to 1500 Hz. The magnetic data were corrected for the sample holder and the diamagnetic contribution.

## **2. Crystallographic data**

**Table S1** Crystal data and structure refinement for compound (**1**)

|                                                    |                                                                                                     |
|----------------------------------------------------|-----------------------------------------------------------------------------------------------------|
| Formula                                            | C <sub>142</sub> H <sub>300</sub> Dy <sub>12</sub> Fe <sub>8</sub> N <sub>40</sub> O <sub>102</sub> |
| Formula weight / g mol <sup>-1</sup>               | 6597.00                                                                                             |
| Crystal System                                     | Tetragonal                                                                                          |
| Space Group                                        | <i>I4<sub>1</sub>/acd</i>                                                                           |
| <i>a</i> / Å                                       | 37.7905(13)                                                                                         |
| <i>c</i> / Å                                       | 61.582(2)                                                                                           |
| <i>U</i> / Å <sup>3</sup>                          | 87947(7)                                                                                            |
| <i>Z</i>                                           | 16                                                                                                  |
| T / K                                              | 150                                                                                                 |
| <i>F</i> (000)                                     | 51968                                                                                               |
| <i>D<sub>c</sub></i> / Mg m <sup>-3</sup>          | 1.993                                                                                               |
| <i>λ</i> / Å                                       | 0.79942                                                                                             |
| <i>μ</i> / mm <sup>-1</sup>                        | 6.236                                                                                               |
| Data Measured                                      | 139306                                                                                              |
| Unique Data                                        | 22903                                                                                               |
| <i>R<sub>int</sub></i>                             | 0.0369                                                                                              |
| Data with <i>I</i> ≥ 2σ( <i>I</i> )                | 18273                                                                                               |
| <i>wR</i> <sub>2</sub> (all data)                  | 0.1996                                                                                              |
| <i>S</i> (all data)                                | 1.576                                                                                               |
| <i>R</i> <sub>1</sub> [ <i>I</i> ≥ 2σ( <i>I</i> )] | 0.0575                                                                                              |
| Parameters/Restraints                              | 1298 / 43                                                                                           |
| Biggest diff. peak/hole / eÅ <sup>-3</sup>         | 4.35 / -2.65                                                                                        |
| CCDC number                                        | 2306455                                                                                             |

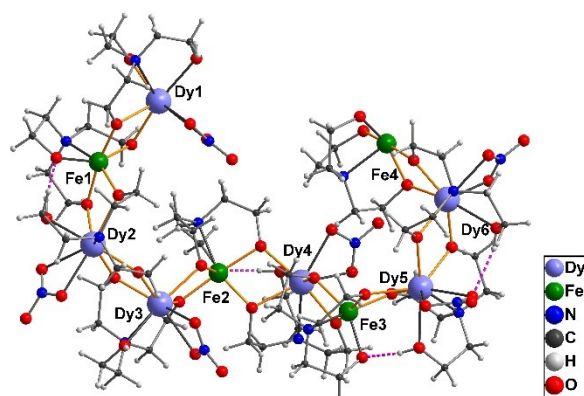

**Fig. S1** Asymmetric unit of the compound (**1**).

**Table S2** Selected bond length (Å) and angles (°) for compound (**1**)

|                      |           |         |           |                     |           |
|----------------------|-----------|---------|-----------|---------------------|-----------|
| Dy1—O29 <sup>i</sup> | 2.252 (6) | Dy4—O40 | 2.505 (6) | Fe3—O22             | 1.965 (6) |
| Dy1—O2               | 2.275 (7) | Dy4—N6  | 2.565 (8) | Fe3—O21             | 1.994 (7) |
| Dy1—O4               | 2.304 (6) | Dy5—O20 | 2.258 (6) | Fe3—O17             | 2.002 (6) |
| Dy1—O1               | 2.323 (6) | Dy5—O25 | 2.274 (6) | Fe3—O19             | 2.006 (6) |
| Dy1—O3               | 2.379 (8) | Dy5—O22 | 2.284 (6) | Fe3—O20             | 2.050 (6) |
| Dy1—O32              | 2.466 (8) | Dy5—O23 | 2.302 (6) | Fe3—N7              | 2.243 (7) |
| Dy1—O31              | 2.527 (7) | Dy5—O24 | 2.424 (6) | Fe4—O30             | 1.973 (6) |
| Dy1—N1               | 2.585 (9) | Dy5—O44 | 2.471 (6) | Fe4—O1 <sup>i</sup> | 1.979 (7) |
| Dy2—O5               | 2.268 (6) | Dy5—O43 | 2.552 (6) | Fe4—O28             | 2.000 (6) |
| Dy2—O10              | 2.279 (6) | Dy5—N8  | 2.590 (7) | Fe4—O26             | 2.014 (7) |
| Dy2—O7               | 2.298 (6) | Dy6—O23 | 2.241 (6) | Fe4—O29             | 2.038 (6) |
| Dy2—O8               | 2.310 (6) | Dy6—O26 | 2.279 (7) | Fe4—N10             | 2.204 (9) |
| Dy2—O9               | 2.454 (7) | Dy6—O25 | 2.287 (6) | Fe1—O5—Dy2          | 105.0 (2) |
| Dy2—O35              | 2.480 (7) | Dy6—O28 | 2.289 (6) | Fe1—O7—Dy2          | 106.2 (3) |
| Dy2—O34              | 2.489 (7) | Dy6—O27 | 2.498 (8) | Dy3—O8—Dy2          | 109.3 (2) |
| Dy2—N3               | 2.591 (8) | Dy6—O47 | 2.499 (8) | Dy3—O10—<br>Dy2     | 111.5 (2) |
| Dy3—O10              | 2.252 (6) | Dy6—O46 | 2.505 (8) | Fe2—O11—<br>Dy3     | 107.2 (2) |
| Dy3—O8               | 2.280 (5) | Dy6—N9  | 2.575 (8) | Fe2—O13—<br>Dy3     | 105.8 (2) |
| Dy3—O13              | 2.320 (5) | Fe1—O7  | 1.960 (6) | Fe2—O14—<br>Dy4     | 102.6 (2) |
| Dy3—O11              | 2.325 (6) | Fe1—O4  | 1.994 (6) | Fe2—O16—<br>Dy4     | 104.2 (3) |
| Dy3—O38              | 2.485 (6) | Fe1—O6  | 1.997 (7) | Fe3—O17—            | 107.6 (3) |

|         |           |         |           |                  |           |
|---------|-----------|---------|-----------|------------------|-----------|
|         |           |         |           | Dy4              |           |
| Dy3—O12 | 2.489 (6) | Fe1—O2  | 2.009 (7) | Fe3—O19—<br>Dy4  | 106.8 (2) |
| Dy3—O37 | 2.489 (6) | Fe1—O5  | 2.027 (6) | Fe3—O20—<br>Dy5  | 105.3 (2) |
| Dy3—N4  | 2.581 (7) | Fe1—N2  | 2.231 (8) | Fe3—O22—<br>Dy5  | 107.2 (2) |
| Dy4—O16 | 2.290 (6) | Fe2—O16 | 1.987 (6) | Dy6—O23—<br>Dy5  | 111.0 (3) |
| Dy4—O14 | 2.292 (6) | Fe2—O11 | 1.991 (6) | Dy5—O25—<br>Dy6  | 110.3 (2) |
| Dy4—O17 | 2.294 (6) | Fe2—O15 | 2.000 (6) | Fe4—O26—<br>Dy6  | 106.4 (3) |
| Dy4—O19 | 2.311 (5) | Fe2—O14 | 2.035 (6) | Fe4—O28—<br>Dy6  | 106.5 (3) |
| Dy4—O18 | 2.395 (6) | Fe2—O13 | 2.036 (5) | Fe4—O29—<br>Dy1i | 104.0 (3) |
| Dy4—O41 | 2.443 (6) | Fe2—N5  | 2.195 (7) |                  |           |

**Table S3** SHAPE analysis of compound (**1**) and reported {Fe<sub>10</sub>Dy<sub>10</sub>}

|     | Fe <sub>10</sub> Dy <sub>10</sub> -Rac     | Fe <sub>8</sub> Dy <sub>12</sub>           |
|-----|--------------------------------------------|--------------------------------------------|
| Fe1 | OC <b>2.96</b><br>TRP 9.44                 | OC <b>3.52</b><br>TRP 8.06                 |
| Fe2 | OC <b>2.68</b><br>TRP 9.57                 | OC <b>2.33</b><br>TRP 9.57                 |
| Fe3 | OC <b>2.90</b><br>TRP 9.32                 | OC <b>3.38</b><br>TRP 8.22                 |
| Fe4 | OC <b>3.18</b><br>TRP 9.40                 | OC <b>2.40</b><br>TRP 9.50                 |
| Fe5 | OC <b>2.45</b><br>TRP 9.33                 | -                                          |
| Dy1 | TDD <b>2.65</b><br>JBTPR 3.40<br>BTPR 2.99 | TDD <b>2.84</b><br>JBTPR 3.44<br>BTPR 3.16 |
| Dy2 | TDD 2.71<br>JBTPR 3.04<br>BTPR <b>2.51</b> | TDD 2.76<br>JBTPR 3.57<br>BTPR <b>2.31</b> |
| Dy3 | TDD <b>2.56</b><br>JBTPR 3.23<br>BTPR 2.71 | TDD <b>2.39</b><br>JBTPR 3.57<br>BTPR 3.35 |
| Dy4 | TDD <b>2.64</b>                            | TDD <b>2.68</b>                            |

|     |                                     |                                     |
|-----|-------------------------------------|-------------------------------------|
|     | JBTPR 3.45<br>BTPR 2.98             | JBTPR 3.50<br>BTPR 3.24             |
| Dy5 | TDD 2.69<br>JBTPR 3.89<br>BTPR 3.53 | TDD 2.29<br>JBTPR 2.34<br>BTPR 2.15 |
| Dy6 | -                                   | TDD 3.05<br>JBTPR 3.08<br>BTPR 2.54 |

OC, octahedron; TPR, trigonal prismatic; TDD, Triangular dodecahedron; JBTPR, Biaugmented trigonal prism J50; BTPR, Biaugmented trigonal prism.

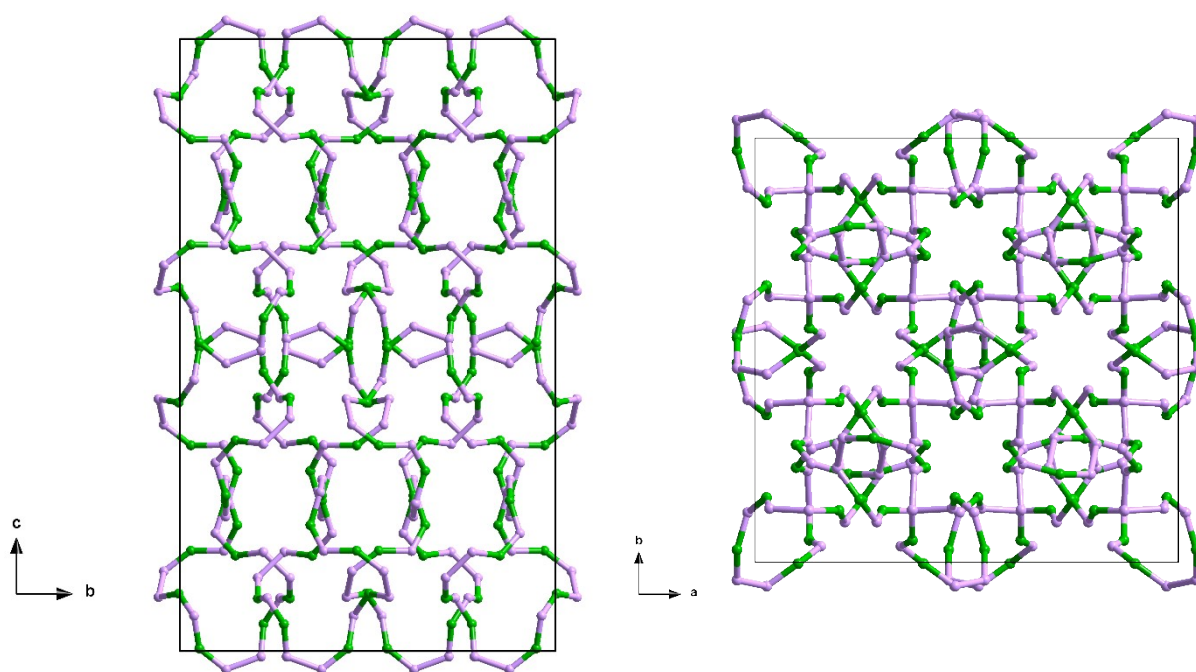

**Fig. S2** Crystal packing of compound (1). Ligands omitted for clarity

### 3. Magnetic Data

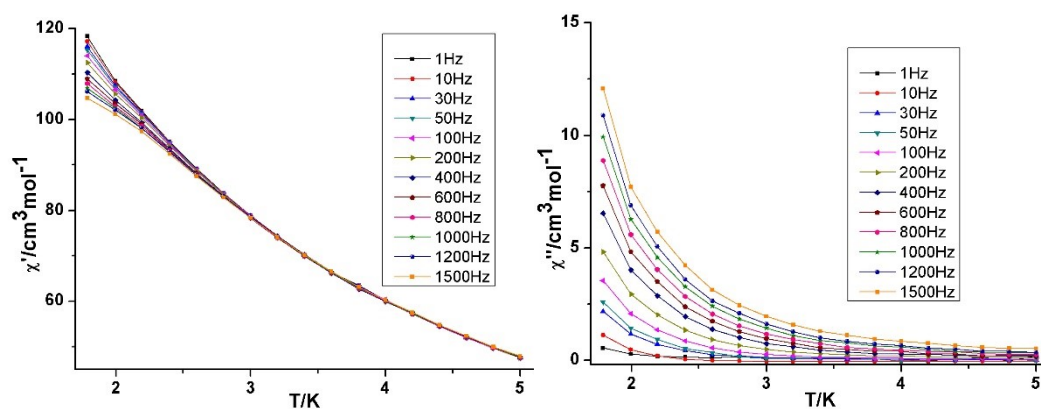

**Fig. S3** Plots of  $\chi'$  (left) and  $\chi''$  (right) vs temperature at different frequencies for (1).

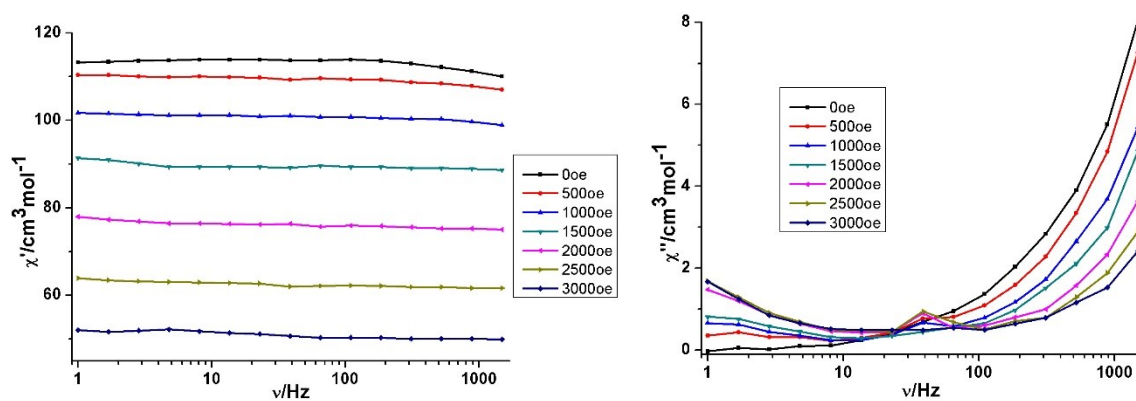

**Fig. S4** Plots of  $\chi'$  (left) and  $\chi''$  (right) vs frequency under different dc magnetic fields for (1) at 1.8 K



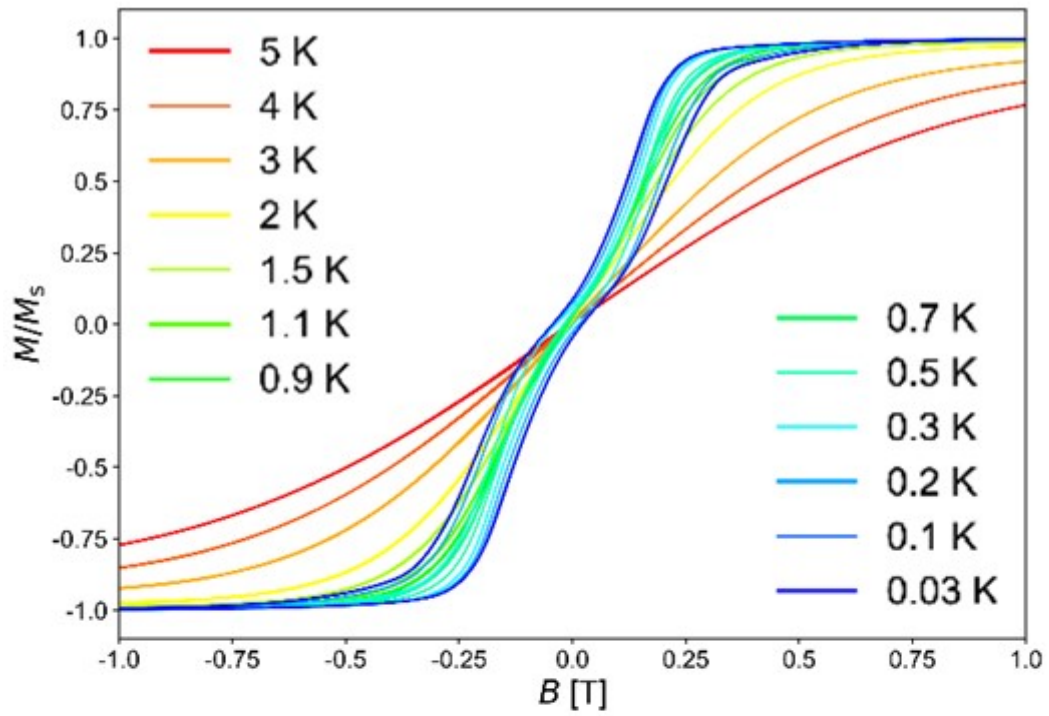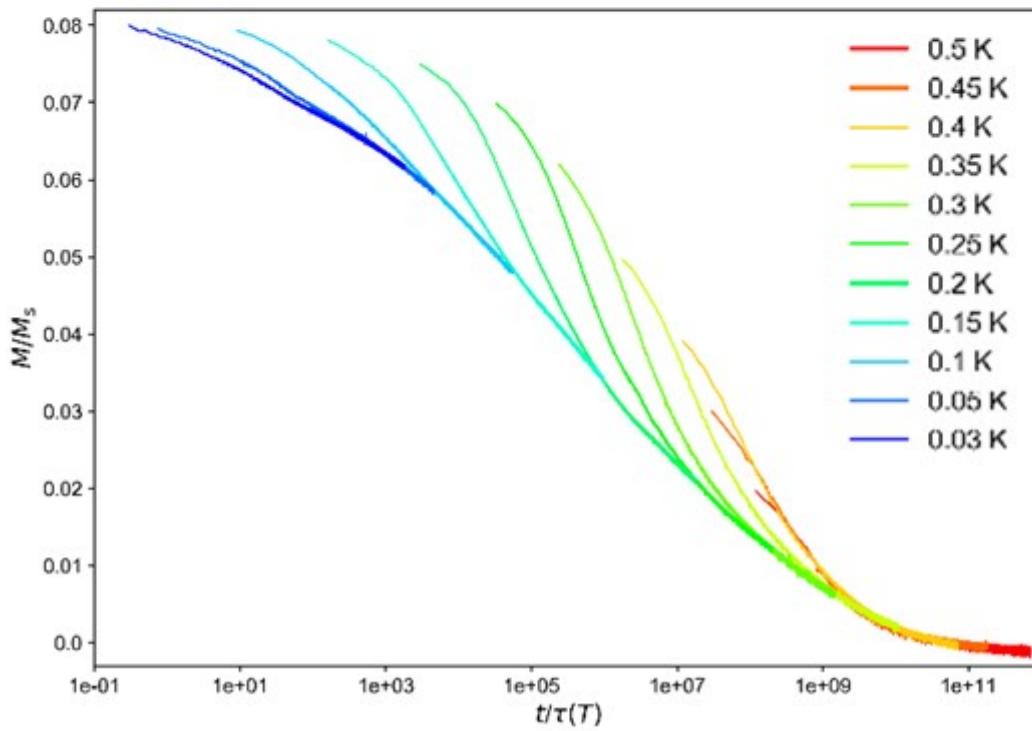

**Fig. S5.** Temperature-dependent microSQUID measurements (top) and magnetisation decay at low temperatures (bottom).

## 4. MAGELLAN

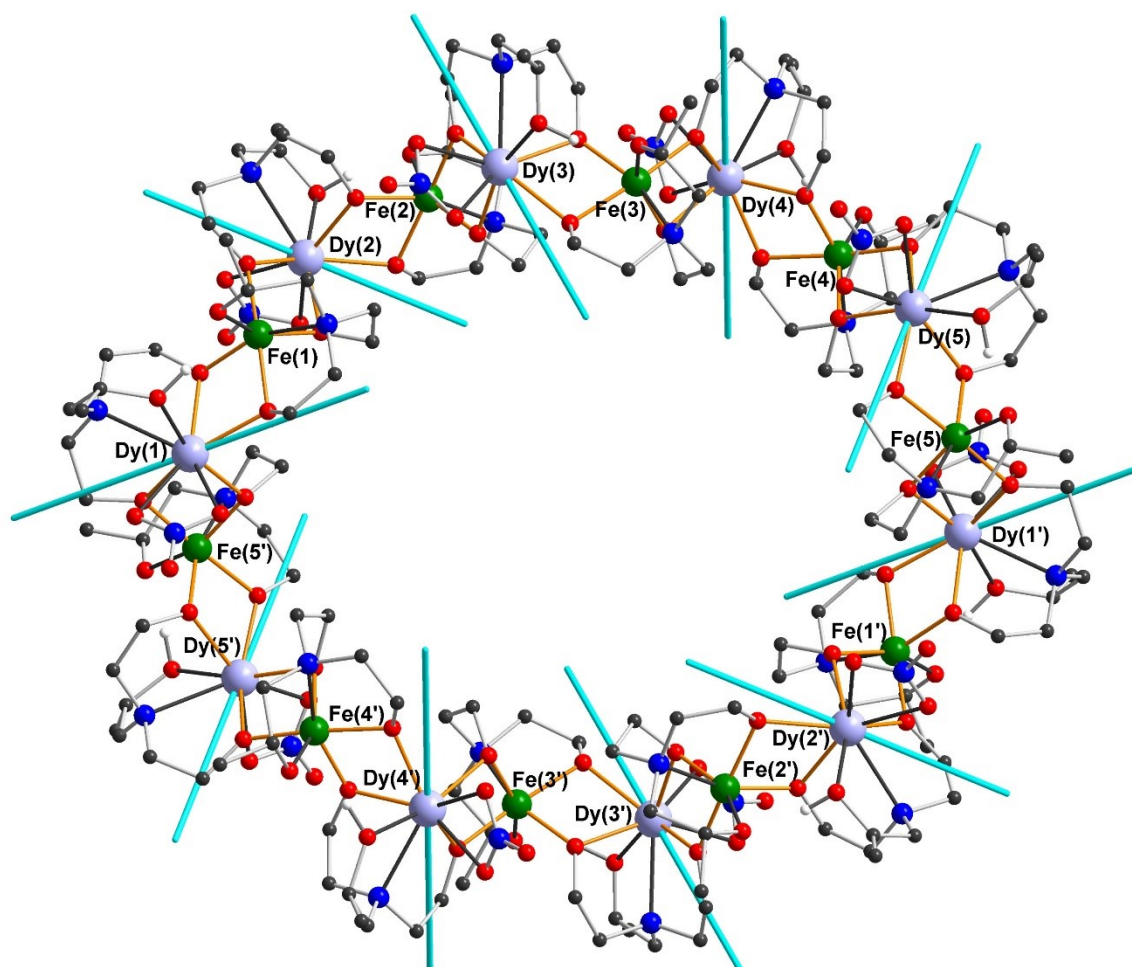

**Fig. S6.** Arrangement of the anisotropy axes in  $\text{Fe}_{10}\text{Dy}_{10}$  calculated using MAGELLAN.<sup>[e]</sup>

For the MAGELLAN analysis of compound **(1)**  $\text{Fe}_8\text{Dy}_{12}$  the charges have been assigned as described in the original publication on MAGELLAN.<sup>[e]</sup> In the case for compound **(1)** this means Fe and Dy all as +3, alkoxo oxygens as -1, nitrate nitrogens as +1, nitrate oxygens as -0.6667 and all other atoms neutral.

### MAGELLAN output file for compound **(1)**:

fe8dy12.xyz; Generated by MAGELLAN, (C) 2013 NICHOLAS F CHILTON and ALESSANDRO SONCINI, nfchilton@gmail.com, asoncini@unimelb.edu.au

Dy1 19.55054 14.47716 20.72422

|       |          |          |          |
|-------|----------|----------|----------|
| Be1a  | 14.69398 | 13.60332 | 19.91786 |
| Be1b  | 24.40710 | 15.35100 | 21.53058 |
| Dy2   | 20.50248 | 20.49492 | 22.77121 |
| Be2a  | 21.83224 | 19.02076 | 27.36017 |
| Be2b  | 19.17272 | 21.96908 | 18.18225 |
| Dy3   | 17.84694 | 21.03646 | 25.35643 |
| Be3a  | 22.19971 | 19.17171 | 26.96146 |
| Be3b  | 13.49417 | 22.90121 | 23.75140 |
| Dy4   | 13.03546 | 17.47357 | 27.24762 |
| Be4a  | 10.33703 | 19.34091 | 31.02009 |
| Be4b  | 15.73389 | 15.60623 | 23.47515 |
| Dy5   | 14.03539 | 14.25080 | 32.63974 |
| Be5a  | 18.20765 | 17.00610 | 32.66383 |
| Be5b  | 9.86313  | 11.49550 | 32.61565 |
| Dy6   | 14.22850 | 10.74044 | 31.35391 |
| Be6a  | 18.30061 | 8.17070  | 30.00691 |
| Be6b  | 10.15639 | 13.31018 | 32.70091 |
| Dy1'  | 13.86571 | 8.79234  | 25.46235 |
| Be1a' | 12.99188 | 3.93578  | 24.65595 |
| Be1b' | 14.73954 | 13.64890 | 26.26875 |
| Dy2'  | 7.84795  | 7.84040  | 23.41536 |

|       |          |          |          |
|-------|----------|----------|----------|
| Be2a' | 6.37380  | 9.17016  | 28.00433 |
| Be2b' | 9.32210  | 6.51064  | 18.82639 |
| Dy3'  | 7.30642  | 10.49593 | 20.83015 |
| Be3a' | 5.44167  | 14.84870 | 22.43518 |
| Be3b' | 9.17117  | 6.14316  | 19.22512 |
| Dy4'  | 10.86930 | 15.30742 | 18.93896 |
| Be4a' | 12.73659 | 12.60899 | 22.71146 |
| Be4b' | 9.00201  | 18.00585 | 15.16646 |
| Dy5'  | 14.09208 | 14.30748 | 13.54683 |
| Be5a' | 16.84736 | 18.47975 | 13.57092 |
| Be5b' | 11.33680 | 10.13521 | 13.52274 |
| Dy6'  | 17.60244 | 14.11437 | 14.83266 |
| Be6a' | 20.17222 | 10.04230 | 16.17968 |
| Be6b' | 15.03266 | 18.18644 | 13.48564 |
| Fe1   | 20.50021 | 17.78383 | 20.70021 |
| Fe2   | 15.03571 | 19.01807 | 25.00418 |
| Fe3   | 14.05391 | 16.94450 | 30.52255 |
| Fe4   | 15.21786 | 10.47099 | 28.06912 |
| Fe1'  | 10.55904 | 7.84266  | 25.48637 |
| Fe2'  | 9.32481  | 13.30717 | 21.18239 |
| Fe3'  | 11.39837 | 14.28897 | 15.66402 |

|      |          |          |          |
|------|----------|----------|----------|
| Fe4' | 17.87188 | 13.12502 | 18.11745 |
| N    | 21.81872 | 13.43414 | 20.05236 |
| C    | 22.03451 | 13.81507 | 18.63351 |
| C    | 20.81727 | 13.46324 | 17.80893 |
| O    | 19.62839 | 13.97153 | 18.45800 |
| C    | 22.83415 | 14.08301 | 20.89665 |
| C    | 22.66712 | 15.56969 | 20.90589 |
| O    | 21.28814 | 15.94117 | 20.84246 |
| C    | 21.82855 | 11.98034 | 20.20078 |
| C    | 20.86376 | 11.54802 | 21.18794 |
| O    | 19.53089 | 12.11374 | 20.99888 |
| H    | 19.20702 | 11.79819 | 20.13488 |
| N    | 20.02292 | 18.24865 | 18.57131 |
| C    | 18.88731 | 17.40253 | 18.19074 |
| C    | 18.03892 | 17.09982 | 19.36942 |
| O    | 18.87447 | 16.66032 | 20.43109 |
| C    | 19.78408 | 19.72966 | 18.47340 |
| C    | 19.04603 | 20.19978 | 19.72475 |
| O    | 19.64312 | 19.61327 | 20.86648 |
| C    | 21.30704 | 17.93197 | 17.87482 |
| C    | 22.49631 | 18.54342 | 18.68339 |

|   |          |          |          |
|---|----------|----------|----------|
| O | 22.25407 | 18.46671 | 20.03389 |
| N | 22.56735 | 19.67751 | 24.10693 |
| C | 22.72116 | 18.22409 | 23.98007 |
| C | 21.38716 | 17.52345 | 23.64876 |
| O | 20.70806 | 18.21275 | 22.60125 |
| C | 22.32171 | 20.14498 | 25.50053 |
| C | 20.90986 | 19.77728 | 25.95378 |
| O | 19.93638 | 20.19940 | 24.99186 |
| C | 23.74188 | 20.41556 | 23.56993 |
| C | 23.85790 | 20.30295 | 22.02545 |
| O | 22.56924 | 20.48699 | 21.44781 |
| H | 22.40825 | 19.93033 | 20.66326 |
| N | 16.90029 | 23.30691 | 24.57618 |
| C | 17.24116 | 23.45694 | 23.09144 |
| C | 17.54084 | 22.17509 | 22.43805 |
| O | 18.43610 | 21.35277 | 23.20598 |
| C | 15.40983 | 23.20639 | 24.73014 |
| C | 14.84562 | 21.95401 | 24.16974 |
| O | 15.65018 | 20.87056 | 24.61252 |
| C | 17.41348 | 24.39641 | 25.39153 |
| C | 18.92548 | 24.29551 | 25.56150 |

|   |          |          |          |
|---|----------|----------|----------|
| O | 19.21269 | 22.99741 | 26.05292 |
| H | 20.10266 | 23.19770 | 26.10773 |
| N | 15.60105 | 17.93537 | 23.18073 |
| C | 17.09302 | 18.02418 | 23.09144 |
| C | 17.62662 | 17.88549 | 24.52261 |
| O | 17.03671 | 18.86275 | 25.34658 |
| C | 15.12414 | 16.54581 | 23.27988 |
| C | 14.35019 | 16.25634 | 24.47149 |
| O | 14.51458 | 17.12325 | 25.53255 |
| C | 14.89286 | 18.67682 | 22.09135 |
| C | 13.43150 | 18.84990 | 22.52365 |
| O | 13.37179 | 19.24066 | 23.91664 |
| N | 11.54084 | 19.52408 | 27.62080 |
| C | 12.48447 | 20.67480 | 27.98599 |
| C | 13.64691 | 20.65440 | 27.14601 |
| O | 14.18731 | 19.39220 | 26.76112 |
| C | 10.74195 | 19.24028 | 28.87030 |
| C | 11.50607 | 18.59784 | 29.91289 |
| O | 12.62089 | 17.86433 | 29.46950 |
| C | 10.67317 | 19.90086 | 26.43473 |
| C | 10.48271 | 18.76752 | 25.52393 |

|   |          |          |          |
|---|----------|----------|----------|
| O | 11.69049 | 17.99168 | 25.33488 |
| H | 12.05252 | 18.60464 | 24.66302 |
| N | 15.91282 | 18.19877 | 30.57921 |
| C | 16.40410 | 18.30118 | 29.15912 |
| C | 16.07835 | 17.00232 | 28.41521 |
| O | 14.70731 | 16.69660 | 28.64183 |
| C | 16.90369 | 17.53782 | 31.49309 |
| C | 16.73099 | 16.05265 | 31.57006 |
| O | 15.34861 | 15.69780 | 31.50910 |
| C | 15.43780 | 19.45946 | 31.12606 |
| C | 14.55577 | 19.20098 | 32.31213 |
| O | 13.70813 | 18.10165 | 32.10952 |
| N | 11.52837 | 14.45713 | 33.25680 |
| C | 10.80922 | 15.21030 | 32.19020 |
| C | 11.52346 | 15.17591 | 30.82677 |
| O | 12.93115 | 15.40719 | 31.00843 |
| C | 11.01177 | 13.08080 | 33.40952 |
| C | 11.45166 | 12.21238 | 32.22468 |
| O | 12.84990 | 12.37979 | 32.01222 |
| C | 11.44750 | 15.19556 | 34.53647 |
| C | 12.23808 | 16.46608 | 34.52293 |



|   |          |          |          |
|---|----------|----------|----------|
| O | 13.51577 | 16.26616 | 33.88309 |
| H | 13.47382 | 16.80506 | 33.07698 |
| N | 16.28771 | 9.89393  | 32.64713 |
| C | 17.06392 | 11.09453 | 33.05419 |
| C | 16.82849 | 12.31668 | 32.17049 |
| O | 15.43251 | 12.55400 | 32.05410 |
| C | 16.94035 | 8.97411  | 31.72648 |
| C | 17.09982 | 9.56289  | 30.36059 |
| O | 15.90300 | 10.13088 | 29.93260 |
| C | 15.88108 | 9.11658  | 33.82828 |
| C | 14.85507 | 9.84102  | 34.63747 |
| O | 13.81999 | 10.37047 | 33.79071 |
| H | 13.59740 | 11.09567 | 34.35296 |
| N | 15.93361 | 12.51697 | 27.67007 |
| C | 15.21181 | 13.39258 | 28.61474 |
| C | 13.79958 | 12.85482 | 28.86415 |
| O | 13.89443 | 11.45052 | 29.20408 |
| C | 15.62448 | 12.84688 | 26.26784 |
| C | 14.39062 | 12.15342 | 25.77149 |
| O | 14.33016 | 10.84096 | 26.27216 |
| C | 17.39119 | 12.36543 | 27.90223 |

|   |          |          |          |
|---|----------|----------|----------|
| C | 17.92441 | 11.09491 | 27.21744 |
| O | 16.99401 | 10.05719 | 27.31536 |
| N | 19.14316 | 14.39365 | 23.61550 |
| O | 20.29539 | 14.15405 | 23.11730 |
| O | 18.22787 | 14.64798 | 22.79831 |
| O | 18.97952 | 14.42652 | 24.82374 |
| N | 20.87396 | 23.32808 | 22.43744 |
| O | 20.48132 | 22.61648 | 21.46875 |
| O | 21.34218 | 22.72607 | 23.45354 |
| O | 20.76890 | 24.54984 | 22.41342 |
| N | 17.64552 | 21.30439 | 28.25879 |
| O | 16.77483 | 21.81532 | 27.46377 |
| O | 18.52641 | 20.57390 | 27.70086 |
| O | 17.61755 | 21.48201 | 29.45164 |
| N | 11.44485 | 15.07010 | 27.17988 |
| O | 10.92712 | 16.16602 | 27.59740 |
| O | 12.62618 | 15.12262 | 26.72294 |
| O | 10.81829 | 14.03501 | 27.19773 |
| N | 15.21823 | 13.50028 | 35.17816 |
| O | 15.82175 | 14.35283 | 34.45888 |
| O | 14.03879 | 13.15298 | 34.85301 |

|   |          |          |          |
|---|----------|----------|----------|
| O | 15.78660 | 12.92662 | 36.09081 |
| N | 12.67796 | 8.29237  | 31.29787 |
| O | 13.89746 | 8.26365  | 31.53373 |
| O | 12.11790 | 9.42419  | 31.11559 |
| O | 12.01738 | 7.23612  | 31.19195 |
| N | 14.90873 | 6.52415  | 26.13421 |
| C | 14.52780 | 6.30837  | 27.55306 |
| C | 14.87963 | 7.52560  | 28.37765 |
| O | 14.37135 | 8.71449  | 27.72857 |
| C | 14.25987 | 5.50872  | 25.28992 |
| C | 12.77319 | 5.67576  | 25.28068 |
| O | 12.40171 | 7.05473  | 25.34411 |
| C | 16.36253 | 6.51433  | 25.98580 |
| C | 16.79485 | 7.47912  | 24.99864 |
| O | 16.22913 | 8.81199  | 25.18769 |
| H | 16.54468 | 9.13585  | 26.05169 |
| N | 10.09422 | 8.31996  | 27.61526 |
| C | 10.94035 | 9.45556  | 27.99584 |
| C | 11.24305 | 10.30396 | 26.81716 |
| O | 11.68256 | 9.46841  | 25.75548 |
| C | 8.61321  | 8.55879  | 27.71318 |

|   |          |          |          |
|---|----------|----------|----------|
| C | 8.14310  | 9.29684  | 26.46183 |
| O | 8.72961  | 8.69975  | 25.32010 |
| C | 10.41090 | 7.03584  | 28.31175 |
| C | 9.79945  | 5.84657  | 27.50318 |
| O | 9.87617  | 6.08881  | 26.15269 |
| N | 8.66536  | 5.77552  | 22.07965 |
| C | 10.11878 | 5.62171  | 22.20651 |
| C | 10.81942 | 6.95572  | 22.53782 |
| O | 10.13012 | 7.63481  | 23.58533 |
| C | 8.19789  | 6.02116  | 20.68604 |
| C | 8.56559  | 7.43301  | 20.23280 |
| O | 8.14347  | 8.40650  | 21.19471 |
| C | 7.92731  | 4.60099  | 22.61664 |
| C | 8.03993  | 4.48498  | 24.16112 |
| O | 7.85589  | 5.77363  | 24.73876 |
| H | 8.41254  | 5.93462  | 25.52332 |
| N | 5.03596  | 11.44259 | 21.61039 |
| C | 4.88593  | 11.10172 | 23.09513 |
| C | 6.16779  | 10.80204 | 23.74852 |
| O | 6.99011  | 9.90678  | 22.98059 |
| C | 5.13648  | 12.93304 | 21.45644 |

|   |          |          |          |
|---|----------|----------|----------|
| C | 6.38886  | 13.49725 | 22.01683 |
| O | 7.47232  | 12.69270 | 21.57406 |
| C | 3.94646  | 10.92939 | 20.79504 |
| C | 4.04736  | 9.41739  | 20.62508 |
| O | 5.34547  | 9.13018  | 20.13365 |
| H | 5.14518  | 8.24022  | 20.07884 |
| N | 10.40750 | 12.74182 | 23.00584 |
| C | 10.31870 | 11.24985 | 23.09513 |
| C | 10.45739 | 10.71625 | 21.66397 |
| O | 9.48012  | 11.30616 | 20.84000 |
| C | 11.79706 | 13.21874 | 22.90669 |
| C | 12.08654 | 13.99269 | 21.71508 |
| O | 11.21962 | 13.82830 | 20.65402 |
| C | 9.66605  | 13.45002 | 24.09523 |
| C | 9.49297  | 14.91138 | 23.66292 |
| O | 9.10222  | 14.97108 | 22.26993 |
| N | 8.81879  | 16.80203 | 18.56577 |
| C | 7.66807  | 15.85841 | 18.20059 |
| C | 7.68848  | 14.69597 | 19.04057 |
| O | 8.95068  | 14.15557 | 19.42546 |
| C | 9.10260  | 17.60093 | 17.31627 |

|   |          |          |          |
|---|----------|----------|----------|
| C | 9.74504  | 16.83680 | 16.27369 |
| O | 10.47855 | 15.72198 | 16.71708 |
| C | 8.44202  | 17.66970 | 19.75184 |
| C | 9.57536  | 17.86017 | 20.66264 |
| O | 10.35120 | 16.65238 | 20.85170 |
| H | 9.73823  | 16.29035 | 21.52356 |
| N | 10.14410 | 12.43005 | 15.60737 |
| C | 10.04169 | 11.93877 | 17.02745 |
| C | 11.34055 | 12.26453 | 17.77136 |
| O | 11.64628 | 13.63557 | 17.54474 |
| C | 10.80506 | 11.43918 | 14.69349 |
| C | 12.29023 | 11.61189 | 14.61651 |
| O | 12.64508 | 12.99426 | 14.67748 |
| C | 8.88341  | 12.90508 | 15.06052 |
| C | 9.14190  | 13.78711 | 13.87445 |
| O | 10.24123 | 14.63475 | 14.07705 |
| N | 13.88574 | 16.81451 | 12.92978 |
| C | 13.13258 | 17.53366 | 13.99638 |
| C | 13.16697 | 16.81942 | 15.35981 |
| O | 12.93569 | 15.41172 | 15.17814 |
| C | 15.26207 | 17.33110 | 12.77705 |

|   |          |          |          |
|---|----------|----------|----------|
| C | 16.13050 | 16.89122 | 13.96189 |
| O | 15.96309 | 15.49297 | 14.17435 |
| C | 13.14731 | 16.89538 | 11.65010 |
| C | 11.87680 | 16.10480 | 11.66365 |
| O | 12.07671 | 14.82710 | 12.30349 |
| H | 11.53782 | 14.86905 | 13.10960 |
| N | 18.44894 | 12.05517 | 13.53944 |
| C | 17.24834 | 11.27895 | 13.13238 |
| C | 16.02620 | 11.51439 | 14.01609 |
| O | 15.78887 | 12.91037 | 14.13248 |
| C | 19.36876 | 11.40253 | 14.46009 |
| C | 18.77999 | 11.24305 | 15.82598 |
| O | 18.21200 | 12.43988 | 16.25398 |
| C | 19.22629 | 12.46180 | 12.35830 |
| C | 18.50185 | 13.48781 | 11.54911 |
| O | 17.97241 | 14.52289 | 12.39586 |
| H | 17.24721 | 14.74548 | 11.83362 |
| N | 15.82591 | 12.40927 | 18.51651 |
| C | 14.95030 | 13.13107 | 17.57184 |
| C | 15.48806 | 14.54330 | 17.32243 |
| O | 16.89235 | 14.44844 | 16.98250 |

|   |          |          |          |
|---|----------|----------|----------|
| C | 15.49599 | 12.71839 | 19.91873 |
| C | 16.18945 | 13.95225 | 20.41508 |
| O | 17.50191 | 14.01272 | 19.91442 |
| C | 15.97745 | 10.95169 | 18.28434 |
| C | 17.24796 | 10.41846 | 18.96913 |
| O | 18.28569 | 11.34887 | 18.87122 |
| N | 13.94923 | 9.19972  | 22.57107 |
| O | 14.18882 | 8.04749  | 23.06927 |
| O | 13.69490 | 10.11501 | 23.38827 |
| O | 13.91635 | 9.36335  | 21.36283 |
| N | 5.01480  | 7.46891  | 23.74914 |
| O | 5.72639  | 7.86156  | 24.71782 |
| O | 5.61680  | 7.00069  | 22.73303 |
| O | 3.79303  | 7.57397  | 23.77315 |
| N | 7.03848  | 10.69736 | 17.92778 |
| O | 6.52755  | 11.56805 | 18.72281 |
| O | 7.76897  | 9.81646  | 18.48571 |
| O | 6.86087  | 10.72532 | 16.73494 |
| N | 13.27278 | 16.89802 | 19.00670 |
| O | 12.17685 | 17.41575 | 18.58917 |
| O | 13.22025 | 15.71669 | 19.46364 |



|   |          |          |          |
|---|----------|----------|----------|
| O | 14.30786 | 17.52459 | 18.98884 |
| N | 14.84260 | 13.12464 | 11.00842 |
| O | 13.99004 | 12.52113 | 11.72770 |
| O | 15.18989 | 14.30408 | 11.33357 |
| O | 15.41626 | 12.55627 | 10.09577 |
| N | 20.05051 | 15.66492 | 14.88870 |
| O | 20.07923 | 14.44542 | 14.65284 |
| O | 18.91868 | 16.22497 | 15.07099 |
| O | 21.10675 | 16.32550 | 14.99463 |

#### **4. References**

- [a] G. M. Sheldrick, *Acta Cryst. A* **2015**, *71*, 3-8.
- [b] G. M. Sheldrick, *Acta Cryst C* **2015**, *71*, 3-8.
- [c] O. V. Dolomanov, L. J. Bourhis, R. J. Gildea, J. A. K. Howard, H. Puschmann, *J. Appl. Cryst.* **2009**, *42*, 339-341.
- [d] A. L. Spek, *Acta Cryst C*, **2015**, *71*, 9-18.
- [e] N. F. Chilton, D. Collison, E. J. McInnes, R. E. Winpenny, A. Soncini, *Nat. Commun.* **2013**, *4*, 2551.
